# Supplementary material
Source: PubMed Central journal article supplement (PMC7001738)

## Supplemental data

### **EGR2 mutations define a new clinically aggressive subgroup of chronic lymphocytic leukemia**

Emma Young<sup>1\*</sup>, Daniel Noerenberg<sup>2\*</sup>, Larry Mansouri<sup>1</sup>, Viktor Ljungström<sup>1</sup>, Mareike Frick<sup>2</sup>, Lesley-Ann Sutton<sup>1</sup>, Stuart J. Blakemore<sup>3</sup>, Joel Galan-Sousa<sup>2</sup>, Karla Plevova<sup>4</sup>, Panagiotis Baliakas<sup>1</sup>, Davide Rossi<sup>5,6</sup>, Ruth Clifford<sup>7</sup>, Damien Roos-Weil<sup>8</sup>, Veronika Navrkalova<sup>4</sup>, Bernd Dörken<sup>2</sup>, Clemens A. Schmitt<sup>2</sup>, Karin E. Smedby<sup>9</sup>, Gunnar Juliusson<sup>10</sup>, Brian Giacomelli<sup>11</sup>, James S. Blachly<sup>11</sup>, Chrysoula Belessi<sup>12</sup>, Panagiotis Panagiotidis<sup>13</sup>, Nicholas Chiorazzi<sup>14</sup>, Frederic Davi<sup>15</sup>, Anton W. Langerak<sup>16</sup>, David Oscier<sup>17</sup>, Anna Schuh<sup>7</sup>, Gianluca Gaidano<sup>5</sup>, Paolo Ghia<sup>18,19</sup>, Wei Xu<sup>20</sup>, Lei Fan<sup>20</sup>, Olivier A. Bernard<sup>8</sup>, Florence Nguyen-Khac<sup>15</sup>, Laura Rassenti<sup>21</sup>, Jianyong Li<sup>20</sup>, Thomas J. Kipps<sup>21</sup>, Kostas Stamatopoulos<sup>1,22</sup>, Sarka Pospisilova<sup>4</sup>, Thorsten Zenz<sup>23</sup>, Christopher C. Oakes<sup>11</sup>, Jonathan C. Strefford<sup>3</sup>, Richard Rosenquist<sup>1\*\*</sup>, and Frederik Damm<sup>2,24\*\*</sup>.

<sup>1</sup>Department of Immunology, Genetics, and Pathology, Science for Life Laboratory, Uppsala University, Sweden

<sup>2</sup>Department of Hematology, Oncology, and Tumor Immunology, Charité, University Medical Center, Berlin, Germany

<sup>3</sup>Cancer Sciences, Faculty of Medicine, University of Southampton, Southampton, United Kingdom

<sup>4</sup>Central European Institute of Technology, Masaryk University and University Hospital Brno, Brno, Czech Republic

<sup>5</sup>Division of Hematology, Department of Translational Medicine, Amedeo Avogadro University of Eastern Piedmont, Novara, Italy

<sup>6</sup>Hematology, Oncology Institute of Southern Switzerland and Institute of Oncology Research, Bellinzona, Switzerland

<sup>7</sup>Oxford National Institute for Health Research Biomedical Research Centre and Department of Oncology, University of Oxford, Oxford, United Kingdom

<sup>8</sup>INSERM, U1170, Institut Gustave Roussy, Villejuif, France

<sup>9</sup>Department of Medicine Solna, Clinical Epidemiology Unit, Karolinska Institutet, and Hematology Center, Karolinska University Hospital, Stockholm, Sweden

<sup>10</sup>Department of Laboratory Medicine, Stem Cell Center, Lund University, Lund, Sweden

<sup>11</sup>Division of Hematology, Department of Internal Medicine, The Ohio State University, Columbus, Ohio, USA

<sup>12</sup>Hematology Department, General Hospital of Nikea, Piraeus, Greece

<sup>13</sup>First Department of Propaedeutic Medicine, School of Medicine, University of Athens, Athens, Greece

<sup>14</sup>Karches Center for Chronic Lymphocytic Leukemia Research, The Feinstein Institute for Medical Research, Manhasset, New York, United States

<sup>15</sup>Laboratory of Hematology and Université Pierre et Marie Curie, Hopital Pitie-Salpetriere, Paris, France

<sup>16</sup>Department of Immunology, Laboratory for Medical Immunology, Erasmus MC, University Medical Center, Rotterdam, The Netherlands

<sup>17</sup>Department of Molecular Pathology, Royal Bournemouth Hospital, Bournemouth, United Kingdom

<sup>18</sup>Università Vita-Salute San Raffaele, Milan, Italy

<sup>19</sup>Division of Experimental Oncology and Department of Onco-Hematology, Istituto di Ricovero e Cura a Carattere Scientifico San Raffaele Scientific Institute, Milan, Italy

<sup>20</sup>Department of Hematology, the First Affiliated Hospital of Nanjing Medical University, Jiangsu Province Hospital, Collaborative Innovation Center For Cancer Personalized Medicine, Nanjing, China

<sup>21</sup>Division of Hematology/Oncology, Department of Medicine, University of California at San Diego/Moores Cancer Center, La Jolla, CA, United States

<sup>22</sup>Institute of Applied Biosciences, Center for Research and Technology Hellas, Thessaloniki, Greece

<sup>23</sup>Molecular Therapy in Haematology and Oncology (G250) & Department of Translational Oncology, National Center for Tumor Diseases (NCT), German Cancer Research Center (DKFZ), Heidelberg, Germany. Department of Medicine V, University Hospital Heidelberg, Heidelberg, Germany, and German Consortium for Translational Cancer Research (DKTK)

<sup>24</sup>Berlin Institute of Health (BIH), Berlin, Germany

\* Contributed equally as first authors.

\*\* Contributed equally as senior authors.

### **Corresponding author**

Richard Rosenquist, MD, PhD

Department of Immunology, Genetics, and Pathology,

Science for Life Laboratory, Uppsala University,

SE-75185 Uppsala, Sweden

phone: +46 18 4714831; Fax: +46 18 554025

e-mail: [richard.rosenquist@igp.uu.se](mailto:richard.rosenquist@igp.uu.se)

## Supplemental Tables

**Table S1:** Clinical and biological characteristics of 366 CLL patients treated within the LRF UK CLL4 trial patient cohort.

|                                     |           |
|-------------------------------------|-----------|
| <b>Age</b>                          |           |
| Median (years)                      | 65        |
| <55 years - no. (%)                 | 52 (14%)  |
| >71 years - no. (%)                 | 80 (22%)  |
| <b>Sex</b>                          |           |
| Female- no. (%)                     | 100 (27%) |
| Male - no. (%)                      | 266 (63%) |
| <b>Binet stage</b>                  |           |
| A (%) - no. (%)                     | 81 (22%)  |
| B/C (%) - no. (%)                   | 285 (78%) |
| <b>CD38<sup>+</sup></b>             |           |
| High (>30%) - no. (%)               | 135 (44%) |
| Low (≤30%) - no. (%)                | 172 (56%) |
| No information                      | 59        |
| <b>IGHV</b>                         |           |
| Mutated (<98% identity) - no. (%)   | 121 (38%) |
| Unmutated (≥98% identity) - no. (%) | 197 (62%) |
| No information                      | 51        |
| <b>ZAP-70</b>                       |           |
| Positiv (≥20%) - no. (%)            | 98 (34%)  |
| Negativ - no. (%)                   | 193 (66%) |
| No information                      | 75        |
| <b>del(13)(q14)</b>                 |           |
| Absent - no. (%)                    | 191 (58%) |
| Present - no. (%)                   | 138 (42%) |
| No information                      | 37        |
| <b>del(11)(q22)</b>                 |           |
| Absent - no. (%)                    | 264 (80%) |
| Present - no. (%)                   | 65 (20%)  |
| No information                      | 37        |
| <b>+12</b>                          |           |
| Absent - no. (%)                    | 285 (87%) |
| Present - no. (%)                   | 44 (13%)  |
| No information                      | 37        |
| <b>del(17)(p13)</b>                 |           |
| Absent - no. (%)                    | 311 (95%) |
| Present - no. (%)                   | 18 (5%)   |
| No information                      | 37        |

Recurrent genomic aberrations were classified according to the Döhner classification.

**Table S2:** Clinical and biological characteristics of 490 CLL patients collected within the CLL Research Consortium (CRC).

|                                     |           |
|-------------------------------------|-----------|
| <b>Age</b>                          |           |
| Median (years)                      | 57        |
| <55 years - no. (%)                 | 215 (44%) |
| >71 years - no. (%)                 | 49 (10%)  |
| no information                      | 4         |
| <b>Sex</b>                          |           |
| Female - no. (%)                    | 159 (32%) |
| Male - no. (%)                      | 331 (68%) |
| <b>Rai stage</b>                    |           |
| 0 - no. (%)                         | 145 (54%) |
| I-II - no. (%)                      | 112 (42%) |
| III-IV - no. (%)                    | 10 (4%)   |
| no information                      | 223       |
| <b>CD38<sup>+</sup></b>             |           |
| High (>30%) - no. (%)               | 168 (38%) |
| Low (≤30%) - no. (%)                | 272 (62%) |
| No information                      | 50        |
| <b>IGHV</b>                         |           |
| Mutated (<98% identity) - no. (%)   | 207 (42%) |
| Unmutated (≥98% identity) - no. (%) | 283 (58%) |
| <b>ZAP-70</b>                       |           |
| Positiv (≥20%) - no. (%)            | 241 (49%) |
| Negativ - no. (%)                   | 249 (51%) |
| <b>del(13)(q14)</b>                 |           |
| Absent - no. (%)                    | 118 (66%) |
| Present - no. (%)                   | 62 (34%)  |
| No information                      | 310       |
| <b>del(11)(q22)</b>                 |           |
| Absent - no. (%)                    | 160 (89%) |
| Present - no. (%)                   | 20 (11%)  |
| No information                      | 310       |
| <b>+12</b>                          |           |
| Absent - no. (%)                    | 158 (88%) |
| Present - no. (%)                   | 22 (12%)  |
| No information                      | 310       |
| <b>del(17)(p13)</b>                 |           |
| Absent - no. (%)                    | 160 (89%) |
| Present - no. (%)                   | 20 (11%)  |
| no information                      | 310       |

Recurrent genomic aberrations were classified according to the Döhner classification.

**Table S3:** Clinical and biological characteristics of 233 Chinese CLL patients.

|                                            |           |
|--------------------------------------------|-----------|
| <b>Age</b>                                 |           |
| Median (years)                             | 59        |
| <55 years - no. (%)                        | 73 (31%)  |
| >71 years - no. (%)                        | 42 (18%)  |
| <b>Sex</b>                                 |           |
| Female - no. (%)                           | 76 (33%)  |
| Male - no. (%)                             | 157 (67%) |
| <b>Binet stage</b>                         |           |
| A - no. (%)                                | 82 (35%)  |
| B/C - no. (%)                              | 150 (65%) |
| no information                             | 1         |
| <b>CD38<sup>+</sup></b>                    |           |
| High (>30%) - no. (%)                      | 56 (29%)  |
| Low ( $\leq$ 30%) - no. (%)                | 124 (71%) |
| No information                             | 43        |
| <b>IGHV</b>                                |           |
| Mutated (<98% identity) - no. (%)          | 127 (56%) |
| Unmutated ( $\geq$ 98% identity) - no. (%) | 98 (44%)  |
| No information                             | 8         |
| <b>ZAP-70</b>                              |           |
| Positiv ( $\geq$ 20%) - no. (%)            | 98 (49%)  |
| Negativ - no. (%)                          | 102 (51%) |
| No information                             | 33        |
| <b>del(13)(q14.3)</b>                      |           |
| Absent - no. (%)                           | 136 (84%) |
| Present - no. (%)                          | 25 (16%)  |
| No information                             | 72        |
| <b>del(11)(q22.3)</b>                      |           |
| Absent - no. (%)                           | 180 (87%) |
| Present - no. (%)                          | 19 (13%)  |
| No information                             | 26        |
| <b>+12</b>                                 |           |
| Absent - no. (%)                           | 164 (86%) |
| Present - no. (%)                          | 26 (14%)  |
| No information                             | 43        |
| <b>del(17)(p13)</b>                        |           |
| Absent - no. (%)                           | 180 (79%) |
| Present - no. (%)                          | 48 (21%)  |
| No information                             | 5         |

Recurrent genomic aberrations were classified according to the Döhner classification.

**Table S4:** Overview of genes and target regions included in the HaloPlex Panel used for NGS analysis.

| <b>Gene</b>     | <b>Transcript ID</b>         | <b>Targeted exons</b> |
|-----------------|------------------------------|-----------------------|
| <b>ATM</b>      | ATM-201 ENST00000278616      | 2-63                  |
| <b>BCOR</b>     | BCOR-201 ENST00000342274     | 2-15                  |
| <b>BDKRB2</b>   | BDKRB2-001 ENST00000554311   | 2-3                   |
| <b>BIRC3</b>    | BIRC3-002 ENST00000263464    | 2-9                   |
| <b>BRAF</b>     | BRAF-001 ENST00000288602     | 11,12,15              |
| <b>CREBBP</b>   | CREBBP-001 ENST00000262367   | 1-31                  |
| <b>DDX3X</b>    | DDX3X-001 ENST00000399959    | 1-17                  |
| <b>EGR2</b>     | EGR2-001 ENST00000242480     | 2                     |
| <b>FBXW7</b>    | FBXW7-001 ENST00000281708    | 2-12                  |
| <b>HIST1H1E</b> | HIST1H1E-001 ENST00000304218 | 1                     |
| <b>IRF4</b>     | IRF4-001 ENST00000380956     | 2-9                   |
| <b>KLHL6</b>    | KLHL6-001 ENST00000341319    | 1                     |
| <b>KRAS</b>     | KRAS-001 ENST00000311936     | 2,3                   |
| <b>MED12</b>    | MED12-002 ENST00000374080    | 1-2                   |
| <b>MYD88</b>    | MYD88-201 ENST00000417037    | 3-5                   |
| <b>NFKBIE</b>   | NFKBIE-001 ENST00000275015   | 1-6                   |
| <b>NOTCH1</b>   | NOTCH1-001 ENST00000277541   | 34                    |
| <b>NRAS</b>     | NRAS-001 ENST00000369535     | 2,3                   |
| <b>POT1</b>     | POT1-001 ENST00000357628     | 5-10, 18              |
| <b>PREX2</b>    | PREX2-001 ENST00000288368    | 1-40                  |
| <b>SAMHD1</b>   | SAMHD1-001 ENST00000262878   | 1-16                  |
| <b>SF3B1</b>    | SF3B1-001 ENST00000335508    | 14-16                 |
| <b>SPEN</b>     | SPEN-001 ENST00000375759     | 1-15                  |
| <b>TET2</b>     | TET2-202 ENST00000540549     | 3-11                  |
| <b>TP53</b>     | TP53-202 ENST00000617185     | 2-10                  |
| <b>UBP1</b>     | UBP1-001 ENST00000283629     | 1-16                  |
| <b>XPO1</b>     | XPO1-001 ENST00000401558     | 15-16                 |
| <b>ZMYM3</b>    | ZMYM3-001 ENST00000373998    | 2-25                  |

**Table S5:** Treatment status for cases screened for *EGR2* mutations in individual cohorts

|           | No. <i>EGR2</i> mutated | No. <i>EGR2</i> mutated tested prior to treatment | No. <i>EGR2</i> mutated tested after treatment | No. <i>EGR2</i> mutated missing treatment data |
|-----------|-------------------------|---------------------------------------------------|------------------------------------------------|------------------------------------------------|
| Screening | 50                      | 35                                                | 9                                              | 6                                              |
| UK CLL4   | 12                      | 12                                                | 0                                              | 0                                              |
| CRC       | 18                      | 13                                                | 5                                              | 0                                              |
| Chinese   | 9                       | 8                                                 | 1                                              | 0                                              |

**Table S6:** Low-burden *EGR2*-mutated CLL patients (n=14) verified in an independent experiment.

| Sample Name | First VAF (%) | Second VAF (%) | AA change |
|-------------|---------------|----------------|-----------|
| H012        | 3.3           | 4.9            | p.H384N   |
| U018        | 4.3           | 4.9            | p.D411H   |
| H003        | 2.2           | 3.2            | p.H384N   |
| B009        | 0.7           | 2.9            | p.H384N   |
| H008        | 0.9           | 2.5            | p.H384N   |
| U013        | 3.5           | 2.0            | p.E412G   |
| B002        | 3.6           | 1.9            | p.E412Q   |
| B010        | 2.1           | 1.5            | p.E356K   |
| H004        | 1.1           | 1.3            | p.E356K   |
| R002        | 0.6           | 1.1            | p.D411H   |
| B001        | 3.1           | 1              | p.D411H   |
| B004        | 1.1           | 0.9            | p.H384N   |
| U019        | 1.0           | 0.8            | p.H384N   |
| H006        | 0.6           | 0.7            | p.E356G   |

AA, amino acid; VAF, variant allele frequency.



**Table S7:** Mean coverage obtained per targeted region of the HaloPlex panel.

| Sample      | Mean Coverage | Fraction Cov 10X | Fraction Cov 50X | Fraction Cov 100X | Fraction Cov 500X | Fraction Cov 1000X |
|-------------|---------------|------------------|------------------|-------------------|-------------------|--------------------|
| B011        | 4565          | 99               | 99               | 98                | 95                | 90                 |
| I014        | 3318          | 99               | 98               | 98                | 94                | 85                 |
| U010        | 2993          | 99               | 99               | 98                | 95                | 88                 |
| B002        | 4279          | 99               | 99               | 99                | 97                | 93                 |
| B006        | 3488          | 99               | 98               | 97                | 91                | 83                 |
| B006        | 6819          | 99               | 99               | 99                | 97                | 95                 |
| H013        | 3088          | 99               | 98               | 98                | 93                | 84                 |
| U009        | 5935          | 99               | 99               | 99                | 97                | 95                 |
| U014        | 4192          | 99               | 99               | 99                | 95                | 91                 |
| R001        | 3383          | 99               | 99               | 98                | 96                | 89                 |
| I001        | 2279          | 99               | 98               | 97                | 87                | 74                 |
| T004        | 5885          | 99               | 99               | 98                | 97                | 93                 |
| U008        | 2478          | 99               | 98               | 97                | 91                | 80                 |
| H004        | 4442          | 99               | 99               | 99                | 96                | 92                 |
| B005        | 2229          | 97               | 95               | 94                | 76                | 64                 |
| I004        | 2128          | 99               | 99               | 98                | 90                | 76                 |
| I003        | 2229          | 99               | 98               | 98                | 92                | 80                 |
| U007        | 7220          | 99               | 99               | 99                | 97                | 96                 |
| B003        | 3162          | 99               | 99               | 99                | 96                | 90                 |
| H010        | 5305          | 99               | 99               | 98                | 98                | 95                 |
| B007        | 4300          | 99               | 98               | 97                | 92                | 85                 |
| I005        | 2933          | 99               | 98               | 97                | 93                | 83                 |
| U006        | 4842          | 99               | 99               | 99                | 97                | 94                 |
| U016        | 4983          | 99               | 99               | 99                | 97                | 94                 |
| I011        | 3619          | 99               | 98               | 98                | 95                | 90                 |
| U005        | 6583          | 99               | 99               | 99                | 97                | 95                 |
| U013        | 3556          | 99               | 99               | 99                | 96                | 90                 |
| U015        | 4315          | 99               | 99               | 99                | 96                | 91                 |
| B008        | 5236          | 99               | 98               | 98                | 96                | 92                 |
| B012        | 2813          | 99               | 99               | 98                | 94                | 86                 |
| I013        | 2546          | 99               | 99               | 98                | 92                | 81                 |
| U004        | 3815          | 99               | 99               | 99                | 96                | 93                 |
| U012        | 5154          | 99               | 99               | 99                | 96                | 94                 |
| I006        | 3400          | 99               | 99               | 99                | 95                | 89                 |
| B014        | 3308          | 99               | 98               | 97                | 92                | 82                 |
| I009        | 3339          | 99               | 99               | 98                | 94                | 84                 |
| U003        | 7871          | 99               | 99               | 99                | 98                | 96                 |
| U011        | 3764          | 99               | 99               | 98                | 94                | 88                 |
| <b>Mean</b> | <b>4100</b>   | <b>99</b>        | <b>99</b>        | <b>98</b>         | <b>94</b>         | <b>88</b>          |

**Table S8:** Co-existing mutations in 38 *EGR2*-mutated CLL identified by targeted enrichment (HaloPlex).

| Sample ID | Chr | Start     | End       | Reference base                   | Variant base | Gene         | Type   | Exonic type         | Variant allele ratio % | #reference alleles | #variant alleles | Read depth | Cosmic ID                 | Transcripts                                    |
|-----------|-----|-----------|-----------|----------------------------------|--------------|--------------|--------|---------------------|------------------------|--------------------|------------------|------------|---------------------------|------------------------------------------------|
| B011      | 10  | 64573332  | 64573332  | C                                | T            | <i>EGR2</i>  | exonic | nonsynonymous SNV   | 44.74                  | 3589               | 2906             | 6495       | COSM145364                | EGR2:NM_000399:exon2:c.G1066A:p.E356K          |
| I014      | 11  | 108121753 | 108121754 | AG                               | -            | <i>ATM</i>   | exonic | frameshift deletion | 32.05                  | 475                | 224              | 696        | -                         | ATM:NM_000051:exon10:c.1561_1562del:p.R521fs   |
| I014      | 10  | 64573332  | 64573332  | C                                | T            | <i>EGR2</i>  | exonic | nonsynonymous SNV   | 40.74                  | 2797               | 1923             | 4720       | ICOSM145364               | EGR2:NM_000399:exon2:c.G1066A:p.E356K          |
| U010      | 10  | 64573248  | 64573248  | G                                | T            | <i>EGR2</i>  | exonic | nonsynonymous SNV   | 29.86                  | 2548               | 1085             | 3634       | COSM145363                | EGR2:NM_000399:exon2:c.C1150A:p.H384N          |
| U010      | 17  | 7577535   | 7577535   | C                                | A            | <i>TP53</i>  | exonic | nonsynonymous SNV   | 32.56                  | 932                | 450              | 1382       | COSM1649403<br>COSM326724 | TP53:NM_001126115:exon3:c.G350T:p.R117M        |
| B002      | 10  | 64573164  | 64573164  | C                                | G            | <i>EGR2</i>  | exonic | nonsynonymous SNV   | 1.89                   | 5092               | 98               | 5628       | -                         | EGR2:NM_000399:exon2:c.G1234C:p.E412Q          |
| B006      | 10  | 64573332  | 64573332  | C                                | T            | <i>EGR2</i>  | exonic | nonsynonymous SNV   | 39.62                  | 2170               | 1424             | 3594       | COSM145364                | EGR2:NM_000399:exon2:c.G1066A:p.E356K          |
| B006      | 17  | 7577538   | 7577538   | C                                | T            | <i>TP53</i>  | exonic | nonsynonymous SNV   | 52.64                  | 997                | 1108             | 2105       | COSM99021<br>COSM99020    | TP53:NM_001126115:exon3:c.G347A:p.R116Q        |
| B006      | X   | 41205629  | 41205629  | G                                | A            | <i>DDX3X</i> | exonic | nonsynonymous SNV   | 76.61                  | 174                | 570              | 744        | -                         | DDX3X:NM_001193417:exon12:c.G1415A:p.R472H     |
| I010      | 10  | 64573332  | 64573332  | C                                | T            | <i>EGR2</i>  | exonic | nonsynonymous SNV   | 37.35                  | 4976               | 2967             | 7943       | COSM145364                | EGR2:NM_000399:exon2:c.G1066A:p.E356K          |
| H013      | 11  | 108143485 | 108143504 | ATGGG<br>AAAAG<br>ACTTT<br>CCTGT | -            | <i>ATM</i>   | exonic | frameshift deletion | 13.48                  | 841                | 131              | 972        | -                         | ATM:NM_000051:exon22:c.3190_3209del:p.M1064fs  |
| H013      | 11  | 108143268 | 108143268 | A                                | -            | <i>ATM</i>   | exonic | frameshift deletion | 41.96                  | 848                | 613              | 1458       | -                         | ATM:NM_000051:exon21:c.3087delA:p.T1029fs      |
| H013      | 10  | 64573332  | 64573332  | C                                | T            | <i>EGR2</i>  | exonic | nonsynonymous SNV   | 46.59                  | 1834               | 1600             | 3434       | COSM145364                | EGR2:NM_000399:exon2:c.G1066A:p.E356K          |
| U009      | 7   | 124511044 | 124511044 | C                                | T            | <i>POT1</i>  | exonic | nonsynonymous SNV   | 12.96                  | 1639               | 244              | 1883       | -                         | POT1:NM_015450:exon7:c.G176A:p.C59Y            |
| U009      | 10  | 64573332  | 64573332  | C                                | T            | <i>EGR2</i>  | exonic | nonsynonymous SNV   | 21.24                  | 4913               | 1325             | 6238       | COSM145364                | EGR2:NM_000399:exon2:c.G1066A:p.E356K          |
| U014      | 10  | 64573165  | 64573165  | A                                | T            | <i>EGR2</i>  | exonic | nonsynonymous SNV   | 5.31                   | 3904               | 219              | 4127       | -                         | EGR2:NM_000399:exon2:c.T1233A:p.D411E          |
| U014      | 12  | 25398281  | 25398281  | C                                | T            | <i>KRAS</i>  | exonic | nonsynonymous SNV   | 5.57                   | 1526               | 90               | 1616       | COSM1140132<br>COSM532    | KRAS:NM_004985:exon2:c.G38A:p.G13D             |
| U014      | 7   | 140453134 | 140453134 | T                                | C            | <i>BRAF</i>  | exonic | nonsynonymous SNV   | 8.64                   | 2315               | 219              | 2534       | COSM478                   | BRAF:NM_004333:exon15:c.A1801G:p.K601E         |
| U014      | 2   | 198267373 | 198267373 | G                                | A            | <i>SF3B1</i> | exonic | nonsynonymous SNV   | 47.15                  | 1037               | 925              | 1962       | -                         | SF3B1:NM_012433:exon14:c.C1984T:p.H662Y        |
| R001      | 3   | 38182749  | 38182753  | GCCTT                            | -            | <i>MYD88</i> | exonic | frameshift deletion | 37.17                  | 1374               | 813              | 2186       | -                         | MYD88:NM_001172568:exon4:c.767_771del:p.R256fs |

|             |    |           |           |   |   |                 |        |                     |              |       |      |       |                           |                                             |
|-------------|----|-----------|-----------|---|---|-----------------|--------|---------------------|--------------|-------|------|-------|---------------------------|---------------------------------------------|
| <b>R001</b> | 2  | 61719472  | 61719472  | C | T | <b>XPO1</b>     | exonic | nonsynonymous SNV   | <b>42</b>    | 1146  | 830  | 1976  | COSM96797                 | XPO1:NM_003400:exon15:c.G1711A:p.E571K      |
| <b>R001</b> | 11 | 108202712 | 108202712 | G | C | <b>ATM</b>      | exonic | nonsynonymous SNV   | <b>49.67</b> | 2145  | 2117 | 4262  | -                         | ATM:NM_000051:exon52:c.G7736C:p.R2579T      |
| <b>R001</b> | 10 | 64573332  | 64573332  | C | T | <b>EGR2</b>     | exonic | nonsynonymous SNV   | <b>50.38</b> | 1745  | 1772 | 3517  | COSM145364                | EGR2:NM_000399:exon2:c.G1066A:p.E356K       |
| <b>R001</b> | 1  | 16260708  | 16260708  | T | - | <b>SPEN</b>     | exonic | frameshift deletion | <b>50.39</b> | 880   | 894  | 1758  | -                         | SPEN:NM_015001:exon11:c.7973delT:p.V2658fs  |
| <b>R001</b> | 11 | 108100002 | 108100002 | C | T | <b>ATM</b>      | exonic | stopgain            | <b>96.77</b> | 17    | 510  | 527   | -                         | ATM:NM_000051:exon4:c.C283T:p.Q95X          |
| <b>I001</b> | 3  | 183273173 | 183273173 | A | G | <b>KLHL6</b>    | exonic | nonsynonymous SNV   | <b>36</b>    | 2107  | 1185 | 3292  | -                         | KLHL6:NM_130446:exon1:c.T269C:p.L90P        |
| <b>I001</b> | 10 | 64573332  | 64573332  | C | T | <b>EGR2</b>     | exonic | nonsynonymous SNV   | <b>3.73</b>  | 23470 | 909  | 24908 | COSM145364                | EGR2:NM_000399:exon2:c.G1066A:p.E356K       |
| <b>T004</b> | 4  | 153249385 | 153249385 | G | A | <b>FBXW7</b>    | exonic | nonsynonymous SNV   | <b>16.35</b> | 3174  | 621  | 3798  | COSM1154293<br>COSM170727 | FBXW7:NM_001013415:exon8:c.C1039T:p.R347C   |
| <b>T004</b> | 10 | 64573248  | 64573248  | G | T | <b>EGR2</b>     | exonic | nonsynonymous SNV   | <b>41.84</b> | 5328  | 3843 | 9192  | COSM145363                | EGR2:NM_000399:exon2:c.C1150A:p.H384N       |
| <b>T004</b> | 17 | 7576897   | 7576897   | G | A | <b>TP53</b>     | exonic | stopgain            | <b>63.3</b>  | 1330  | 2296 | 3627  | COSM1709728<br>COSM10786  | TP53:NM_001126115:exon5:c.C553T:p.Q185X     |
| <b>T004</b> | X  | 70460923  | 70460923  | T | C | <b>ZMYM3</b>    | exonic | nonsynonymous SNV   | <b>89.87</b> | 222   | 1969 | 2191  | -                         | ZMYM3:NM_001171162:exon25:c.A3920G:p.Y1307C |
| <b>U008</b> | 17 | 7578265   | 7578265   | A | G | <b>TP53</b>     | exonic | nonsynonymous SNV   | <b>8.78</b>  | 3116  | 300  | 3417  | COSM116924<br>COSM11089   | TP53:NM_001126115:exon2:c.T188C:p.I63T      |
| <b>U008</b> | 10 | 64573335  | 64573335  | C | T | <b>EGR2</b>     | exonic | nonsynonymous SNV   | <b>42.29</b> | 1419  | 1040 | 2459  | -                         | EGR2:NM_000399:exon2:c.G1063A:p.D355N       |
| <b>U008</b> | 3  | 183273210 | 183273210 | C | G | <b>KLHL6</b>    | exonic | nonsynonymous SNV   | <b>43.87</b> | 1429  | 1117 | 2546  | -                         | KLHL6:NM_130446:exon1:c.G232C:p.V78L        |
| <b>U008</b> | 11 | 108164196 | 108164196 | C | T | <b>ATM</b>      | exonic | nonsynonymous SNV   | <b>45.58</b> | 406   | 340  | 746   | -                         | ATM:NM_000051:exon31:c.C4768T:p.L1590F      |
| <b>H004</b> | 10 | 64573248  | 64573248  | G | T | <b>EGR2</b>     | exonic | nonsynonymous SNV   | <b>1.13</b>  | 5677  | 65   | 5987  | COSM145363                | EGR2:NM_000399:exon2:c.C1150A:p.H384N       |
| <b>B005</b> | 11 | 108200961 | 108200961 | G | A | <b>ATM</b>      | exonic | nonsynonymous SNV   | <b>6.42</b>  | 1006  | 69   | 1075  | COSM20404<br>COSM1474994  | ATM:NM_000051:exon50:c.G7328A:p.R2443Q      |
| <b>B005</b> | 2  | 61719472  | 61719472  | C | T | <b>XPO1</b>     | exonic | nonsynonymous SNV   | <b>32.74</b> | 682   | 332  | 1014  | COSM96797                 | XPO1:NM_003400:exon15:c.G1711A:p.E571K      |
| <b>B005</b> | 10 | 64573332  | 64573332  | C | T | <b>EGR2</b>     | exonic | nonsynonymous SNV   | <b>50.34</b> | 2868  | 2907 | 5775  | COSM145364                | EGR2:NM_000399:exon2:c.G1066A:p.E356K       |
| <b>I004</b> | 11 | 108186605 | 108186605 | G | A | <b>ATM</b>      | exonic | nonsynonymous SNV   | <b>20.12</b> | 1501  | 378  | 1879  | -                         | ATM:NM_000051:exon41:c.G6062A:p.C2021Y      |
| <b>I004</b> | 10 | 64573332  | 64573332  | C | T | <b>EGR2</b>     | exonic | nonsynonymous SNV   | <b>40.95</b> | 1906  | 1322 | 3228  | COSM145364                | EGR2:NM_000399:exon2:c.G1066A:p.E356K       |
| <b>I004</b> | 8  | 69017544  | 69017544  | C | T | <b>PREX2</b>    | exonic | nonsynonymous SNV   | <b>56.04</b> | 462   | 589  | 1051  | -                         | PREX2:NM_025170:exon24:c.C2887T:p.P963S     |
| <b>I003</b> | 10 | 64573248  | 64573248  | G | T | <b>EGR2</b>     | exonic | nonsynonymous SNV   | <b>45.14</b> | 1473  | 1212 | 2685  | COSM145363                | EGR2:NM_000399:exon2:c.C1150A:p.H384N       |
| <b>U007</b> | 10 | 64573248  | 64573248  | G | T | <b>EGR2</b>     | exonic | nonsynonymous SNV   | <b>36.01</b> | 5342  | 3007 | 8350  | COSM145363                | EGR2:NM_000399:exon2:c.C1150A:p.H384N       |
| <b>U007</b> | 6  | 26156632  | 26156632  | C | T | <b>HIST1H1E</b> | exonic | nonsynonymous SNV   | <b>49.01</b> | 3754  | 3608 | 7362  | -                         | HIST1H1E:NM_005321:exon1:c.C14T:p.A5V       |
| <b>B003</b> | 7  | 140453136 | 140453136 | A | T | <b>BRAF</b>     | exonic | nonsynonymous SNV   | <b>47.65</b> | 993   | 904  | 1897  | COSM476                   | BRAF:NM_004333:exon15:c.T1799A:p.V600E      |

|             |    |           |           |       |   |               |        |                     |              |      |      |      |                           |                                                  |
|-------------|----|-----------|-----------|-------|---|---------------|--------|---------------------|--------------|------|------|------|---------------------------|--------------------------------------------------|
| <b>B003</b> | 10 | 64573248  | 64573248  | G     | T | <b>EGR2</b>   | exonic | nonsynonymous SNV   | <b>49.2</b>  | 2074 | 2009 | 4083 | COSM145363                | EGR2:NM_000399:exon2:c.C1150A:p.H384N            |
| <b>B003</b> | 2  | 198266831 | 198266831 | C     | A | <b>SF3B1</b>  | exonic | nonsynonymous SNV   | <b>50.61</b> | 1953 | 2002 | 3956 | COSM130408                | SF3B1:NM_012433:exon15:c.G2101T:p.V701F          |
| <b>H010</b> | 4  | 153249385 | 153249385 | G     | A | <b>FBXW7</b>  | exonic | nonsynonymous SNV   | <b>19.54</b> | 3130 | 761  | 3894 | COSM1154293<br>COSM170727 | FBXW7:NM_001013415:exon8:c.C1039T:p.R347C        |
| <b>H010</b> | 10 | 64573389  | 64573389  | C     | T | <b>EGR2</b>   | exonic | nonsynonymous SNV   | <b>35.85</b> | 2319 | 1296 | 3615 | -                         | EGR2:NM_000399:exon2:c.G1009A:p.E337K            |
| <b>H010</b> | 16 | 3820885   | 3820885   | T     | C | <b>CREBBP</b> | exonic | nonsynonymous SNV   | <b>45.77</b> | 2169 | 1831 | 4000 | -                         | CREBBP:NM_001079846:exon13:c.A2452G:p.T818A      |
| <b>B007</b> | 3  | 33450823  | 33450823  | T     | A | <b>UBP1</b>   | exonic | nonsynonymous SNV   | <b>5.61</b>  | 4338 | 258  | 4596 | -                         | UBP1:NM_001128160:exon7:c.A724T:p.R242W          |
| <b>B007</b> | 10 | 64573332  | 64573332  | C     | T | <b>EGR2</b>   | exonic | nonsynonymous SNV   | <b>32.82</b> | 4050 | 1979 | 6029 | COSM145364                | EGR2:NM_000399:exon2:c.G1066A:p.E356K            |
| <b>B007</b> | 11 | 102207502 | 102207506 | ATAAA | - | <b>BIRC3</b>  | exonic | frameshift deletion | <b>37.6</b>  | 239  | 144  | 383  | -                         | BIRC3:NM_001165:exon8:c.1591_1595del:p.I531fs    |
| <b>B007</b> | 4  | 106197606 | 106197606 | C     | T | <b>TET2</b>   | exonic | nonsynonymous SNV   | <b>44.64</b> | 2133 | 1720 | 3853 | -                         | TET2:NM_001127208:exon11:c.C5939T:p.T1980I       |
| <b>I005</b> | 10 | 64573248  | 64573248  | G     | T | <b>EGR2</b>   | exonic | nonsynonymous SNV   | <b>37.86</b> | 2478 | 1510 | 3989 | COSM145363                | EGR2:NM_000399:exon2:c.C1150A:p.H384N            |
| <b>I005</b> | 11 | 108181014 | 108181014 | A     | G | <b>ATM</b>    | exonic | nonsynonymous SNV   | <b>45.72</b> | 1282 | 1080 | 2362 | -                         | ATM:NM_000051:exon39:c.A5890G:p.K1964E           |
| <b>U006</b> | 10 | 64573335  | 64573335  | C     | T | <b>EGR2</b>   | exonic | nonsynonymous SNV   | <b>25.75</b> | 4060 | 1408 | 5468 | -                         | EGR2:NM_000399:exon2:c.G1063A:p.D355N            |
| <b>U016</b> | 11 | 108141793 | 108141793 | T     | G | <b>ATM</b>    | exonic | stopgain            | <b>27.69</b> | 969  | 371  | 1340 | -                         | ATM:NM_000051:exon19:c.T2841G:p.Y947X            |
| <b>U016</b> | 4  | 153249384 | 153249384 | C     | T | <b>FBXW7</b>  | exonic | nonsynonymous SNV   | <b>35.1</b>  | 3117 | 1686 | 4803 | COSM117310<br>COSM117309  | FBXW7:NM_001013415:exon8:c.G1040A:p.R347H        |
| <b>U016</b> | 10 | 64573332  | 64573332  | C     | T | <b>EGR2</b>   | exonic | nonsynonymous SNV   | <b>38.22</b> | 3187 | 1972 | 5159 | COSM145364                | EGR2:NM_000399:exon2:c.G1066A:p.E356K            |
| <b>U016</b> | 17 | 7576911   | 7576911   | G     | C | <b>TP53</b>   | exonic | nonsynonymous SNV   | <b>45.04</b> | 1733 | 1420 | 3154 | COSM44967                 | TP53:NM_001126115:exon5:c.C539G:p.T180S          |
| <b>I011</b> | 10 | 64573248  | 64573248  | G     | T | <b>EGR2</b>   | exonic | nonsynonymous SNV   | <b>25.1</b>  | 4030 | 1351 | 5383 | COSM145363                | EGR2:NM_000399:exon2:c.C1150A:p.H384N            |
| <b>U005</b> | 10 | 64573248  | 64573248  | G     | T | <b>EGR2</b>   | exonic | nonsynonymous SNV   | <b>25.74</b> | 5435 | 1884 | 7320 | COSM145363                | EGR2:NM_000399:exon2:c.C1150A:p.H384N            |
| <b>U005</b> | 9  | 139390649 | 139390650 | AG    | - | <b>NOTCH1</b> | exonic | frameshift deletion | <b>35.36</b> | 1684 | 921  | 2588 | COSM12774<br>COSM1292819  | NOTCH1:NM_017617:exon34:c.7541_7542del:p.P2514fs |
| <b>U013</b> | 4  | 106193872 | 106193872 | A     | G | <b>TET2</b>   | exonic | nonsynonymous SNV   | <b>48.2</b>  | 1092 | 1016 | 2108 | -                         | TET2:NM_001127208:exon10:c.A4334G:p.Q1445R       |
| <b>U013</b> | 10 | 64573163  | 64573163  | T     | C | <b>EGR2</b>   | exonic | nonsynonymous SNV   | <b>1.96</b>  | 4657 | 93   | 5041 | -                         | EGR2:NM_000399:exon2:c.A1235G:p.E412G            |
| <b>U015</b> | 10 | 64573332  | 64573332  | C     | T | <b>EGR2</b>   | exonic | nonsynonymous SNV   | <b>37.22</b> | 2728 | 1617 | 4345 | COSM145364                | EGR2:NM_000399:exon2:c.G1066A:p.E356K            |
| <b>U015</b> | 11 | 108168061 | 108168061 | C     | T | <b>ATM</b>    | exonic | stopgain            | <b>63.55</b> | 199  | 347  | 546  | -                         | ATM:NM_000051:exon33:c.C4957T:p.Q1653X           |
| <b>B008</b> | 17 | 7578550   | 7578550   | G     | A | <b>TP53</b>   | exonic | nonsynonymous SNV   | <b>83.24</b> | 748  | 3716 | 4464 | COSM216414<br>COSM3378368 | TP53:NM_001126118:exon4:c.C263T:p.S88F           |
| <b>B008</b> | 10 | 64573332  | 64573332  | C     | T | <b>EGR2</b>   | exonic | nonsynonymous SNV   | <b>4.09</b>  | 6541 | 279  | 7135 | COSM145364                | EGR2:NM_000399:exon2:c.G1066A:p.E356K            |

|             |    |           |           |    |   |               |        |                     |              |      |      |      |                          |                                                    |
|-------------|----|-----------|-----------|----|---|---------------|--------|---------------------|--------------|------|------|------|--------------------------|----------------------------------------------------|
| <b>B012</b> | 9  | 139390649 | 139390650 | AG | - | <b>NOTCH1</b> | exonic | frameshift deletion | <b>35.49</b> | 809  | 445  | 1246 | COSM12774<br>COSM1292819 | NOTCH1:NM_017617:exon34:c.7541_7542del:p.P2514fs   |
| <b>B012</b> | 10 | 64573248  | 64573248  | G  | T | <b>EGR2</b>   | exonic | nonsynonymous SNV   | <b>36.14</b> | 2093 | 1185 | 3279 | COSM145363               | EGR2:NM_000399:exon2:c.C1150A:p.H384N              |
| <b>I013</b> | 11 | 108201102 | 108201102 | T  | G | <b>ATM</b>    | exonic | nonsynonymous SNV   | <b>12.67</b> | 1068 | 155  | 1223 | -                        | ATM:NM_000051:exon50:c.T7469G:p.L2490R             |
| <b>I013</b> | 10 | 64573332  | 64573332  | C  | T | <b>EGR2</b>   | exonic | nonsynonymous SNV   | <b>34.08</b> | 2009 | 1039 | 3049 | COSM145364               | EGR2:NM_000399:exon2:c.G1066A:p.E356K              |
| <b>I013</b> | 11 | 108153521 | 108153521 | T  | A | <b>ATM</b>    | exonic | nonsynonymous SNV   | <b>38.95</b> | 279  | 178  | 457  | -                        | ATM:NM_000051:exon25:c.T3661A:p.W1221R             |
| <b>U004</b> | 9  | 139390649 | 139390650 | AG | - | <b>NOTCH1</b> | exonic | frameshift deletion | <b>19.62</b> | 1610 | 393  | 1997 | COSM12774<br>COSM1292819 | NOTCH1:NM_017617:exon34:c.7541_7542del:p.P2514fs   |
| <b>U004</b> | 11 | 64573248  | 64573248  | G  | T | <b>EGR2</b>   | exonic | nonsynonymous SNV   | <b>33.94</b> | 2703 | 1389 | 4092 | COSM145363               | EGR2:NM_000399:exon2:c.C1150A:p.H384N              |
| <b>U012</b> | 17 | 7577599   | 7577599   | -  | A | <b>TP53</b>   | exonic | stopgain            | <b>37.86</b> | 1537 | 937  | 2475 | COSM69213                | TP53:NM_001126115:exon3:c.285dupT:p.D96_C97delinsX |
| <b>U012</b> | 10 | 64573248  | 64573248  | G  | T | <b>EGR2</b>   | exonic | nonsynonymous SNV   | <b>41.18</b> | 3601 | 2522 | 6124 | COSM145363               | EGR2:NM_000399:exon2:c.C1150A:p.H384N              |
| <b>U012</b> | 14 | 96706744  | 96706744  | G  | A | <b>BDKRB2</b> | exonic | nonsynonymous SNV   | <b>51.96</b> | 2414 | 2611 | 5025 | COSM959336               | BDKRB2:NM_000623:exon3:c.G79A:p.D27N               |
| <b>I006</b> | 2  | 198267484 | 198267484 | G  | A | <b>SF3B1</b>  | exonic | nonsynonymous SNV   | <b>24.11</b> | 768  | 244  | 1012 | COSM110696               | SF3B1:NM_012433:exon14:c.C1873T:p.R625C            |
| <b>I006</b> | 10 | 64573121  | 64573121  | C  | T | <b>EGR2</b>   | exonic | nonsynonymous SNV   | <b>45.66</b> | 2881 | 2422 | 5304 | -                        | EGR2:NM_000399:exon2:c.G1277A:p.R426Q              |
| <b>B014</b> | 10 | 64573332  | 64573332  | C  | T | <b>EGR2</b>   | exonic | nonsynonymous SNV   | <b>52.74</b> | 2707 | 3021 | 5728 | COSM145364               | EGR2:NM_000399:exon2:c.G1066A:p.E356K              |
| <b>I009</b> | 6  | 394951    | 394951    | T  | A | <b>IRF4</b>   | exonic | nonsynonymous SNV   | <b>35.3</b>  | 2277 | 1243 | 3521 | -                        | IRF4:NM_001195286:exon3:c.T347A:p.L116Q            |
| <b>I009</b> | 11 | 108192065 | 108192065 | G  | A | <b>ATM</b>    | exonic | nonsynonymous SNV   | <b>35.97</b> | 1111 | 624  | 1735 | COSM1474991<br>COSM22475 | ATM:NM_000051:exon45:c.G6490A:p.E2164K             |
| <b>I009</b> | 10 | 64573332  | 64573332  | C  | T | <b>EGR2</b>   | exonic | nonsynonymous SNV   | <b>39.53</b> | 3118 | 2038 | 5156 | COSM145364               | EGR2:NM_000399:exon2:c.G1066A:p.E356K              |
| <b>U003</b> | 2  | 198267385 | 198267385 | A  | G | <b>SF3B1</b>  | exonic | nonsynonymous SNV   | <b>9.63</b>  | 4122 | 439  | 4561 | -                        | SF3B1:NM_012433:exon14:c.T1972C:p.W658R            |
| <b>U003</b> | 11 | 108117756 | 108117757 | AT | - | <b>ATM</b>    | exonic | frameshift deletion | <b>10.53</b> | 2455 | 289  | 2741 | -                        | ATM:NM_000051:exon8:c.967_968del:p.I323fs          |
| <b>U003</b> | 11 | 108201023 | 108201023 | T  | C | <b>ATM</b>    | exonic | nonsynonymous SNV   | <b>11.16</b> | 2491 | 313  | 2804 | COSM758329               | ATM:NM_000051:exon50:c.T7390C:p.C2464R             |
| <b>U003</b> | 10 | 64573248  | 64573248  | G  | T | <b>EGR2</b>   | exonic | nonsynonymous SNV   | <b>43.88</b> | 4941 | 3863 | 8804 | COSM145363               | EGR2:NM_000399:exon2:c.C1150A:p.H384N              |
| <b>U011</b> | 10 | 64573248  | 64573248  | G  | T | <b>EGR2</b>   | exonic | nonsynonymous SNV   | <b>44.06</b> | 2562 | 2020 | 4586 | COSM145363               | EGR2:NM_000399:exon2:c.C1150A:p.H384N              |

**Table S9:** Multivariate Cox proportional hazard analysis of time-to-first-treatment (TTFT, cases, n=735; events, n=478) and overall survival (OS, cases, n=688; events, n=285) in the screening cohort.

| Variable                      | TTFT         |                         |         | OS           |                         |         |
|-------------------------------|--------------|-------------------------|---------|--------------|-------------------------|---------|
|                               | Hazard ratio | 95% Confidence interval | P-value | Hazard ratio | 95% Confidence interval | P-value |
| <i>EGR2</i> mutation status   | 1.52         | 1.06 – 2.20             | .024    | 1.92         | 1.23 – 2.97             | .003    |
| Age                           | 1.07         | 0.88 – 1.28             | .490    | 2.48         | 1.93 – 3.18             | < .001  |
| Gender                        | 1.11         | 0.92 – 1.34             | .264    | 1.18         | 0.92 – 1.52             | .193    |
| Binet stage                   | NA           | NA                      | NA      | 1.90         | 1.47 – 2.46             | < .001  |
| IGHV mutation status          | 3.77         | 3.03 – 4.65             | < .001  | 3.14         | 2.36 – 4.17             | < .001  |
| <i>NOTCH1</i> mutation status | 1.12         | 0.85 – 1.49             | .429    | 1.30         | 0.90 – 1.86             | .159    |
| <i>SF3B1</i> mutation status  | 1.60         | 1.22 – 2.06             | < .001  | 1.47         | 1.03 – 2.10             | .035    |
| <i>TP53</i> abn               | 1.35         | 1.05 – 1.60             | .019    | 1.80         | 1.30 – 2.48             | < .001  |

**Table S10:** Multivariate Cox proportional hazard analysis of time-to-first-treatment (TTFT, cases, n=428; events, n=294) and overall survival (OS, cases, n=486; events, n=128) in the CRC cohort.

| Variable                    | TTFT         |                         |         | OS           |                         |         |
|-----------------------------|--------------|-------------------------|---------|--------------|-------------------------|---------|
|                             | Hazard ratio | 95% Confidence interval | P-value | Hazard ratio | 95% Confidence interval | P-value |
| <i>EGR2</i> mutation status | 1.92         | 1.11 – 3.32             | .020    | 1.90         | 0.88 – 4.12             | .10     |
| Age                         | 1.05         | 0.84 – 1.33             | .66     | 1.70         | 1.19 – 2.43             | .004    |
| Gender                      | 1.06         | 0.82 – 1.36             | .65     | 1.46         | 0.97 – 2.18             | .07     |
| IGHV mutation status        | 2.06         | 1.60 – 2.64             | < .001  | 2.55         | 1.68 – 3.86             | < .001  |

**Table S11:** Cytogenetics and mutation allele frequencies of 38 *EGR2*-mutated CLL samples investigated by Haloplex gene panel.

| Sample ID | <i>EGR2</i> VAF (%) | Cytogenetic aberration | del(11q) (%) | <i>TP53</i> VAF (%) | <i>NOTCH1</i> VAF (%) | <i>SF3B1</i> VAF (%) | <i>ATM</i> VAF (%) |
|-----------|---------------------|------------------------|--------------|---------------------|-----------------------|----------------------|--------------------|
| H013      | 46.6                | del(13q)               |              |                     |                       |                      | 13.5/41.9          |
| I014      | 40.7                | del(11q)               | 91           |                     |                       |                      | 32.1               |
| U016      | 38.2                | del(13q)               |              | 45.0                |                       |                      | 27.7               |
| U015      | 37.2                | del(11q)               | 75           |                     |                       |                      | 63.6               |
| U008      | 42.3                | no RCA                 |              | 8.8                 |                       |                      | 45.6               |
| U003      | 43.9                | del(11q)               | NA           |                     |                       | 9.6                  | 10.5/11.2          |
| R001      | 50.4                | NA                     |              |                     |                       |                      | 96.8/49.7          |
| B005      | 50.3                | del(11q)               | 87           |                     |                       |                      | 6.4/5.8            |
| I009      | 39.5                | del(11q)               | 77           |                     |                       |                      | 36.0               |
| I013      | 34.1                | del(11q)               | 97           |                     |                       |                      | 12.7/38.9          |
| I005      | 37.9                | +12                    |              |                     |                       |                      | 45.7               |
| I004      | 40.9                | del(11q)               | 80           |                     |                       |                      | 20.1               |
| T004      | 41.8                | del(17p)               |              | 63.3                |                       |                      |                    |
| U012      | 41.2                | no RCA                 |              | 37.7                |                       |                      |                    |
| U010      | 29.9                | del(17p)               |              | 32.6                |                       |                      |                    |
| B006      | 39.6                | del(11q)               | NA           | 52.6                |                       |                      |                    |
| U014      | 5.3                 | no RCA                 |              |                     |                       | 47.2                 |                    |
| B003      | 49.2                | no RCA                 |              |                     |                       | 50.6                 |                    |
| I006      | 45.7                | del(13q)               |              |                     |                       | 24.1                 |                    |
| B012      | 36.1                | del(13q)               |              |                     | 35.5                  |                      |                    |
| U004      | 33.9                | del(13q)               |              |                     | 19.6                  |                      |                    |
| U005      | 25.7                | +12                    |              |                     | 35.4                  |                      |                    |
| H010      | 35.9                | del(13q)               |              |                     |                       |                      |                    |
| B007      | 32.8                | del(11q)               | 99           |                     |                       |                      |                    |
| U007      | 36.0                | +12                    |              |                     |                       |                      |                    |
| U006      | 25.8                | NA                     |              |                     |                       |                      |                    |
| B011      | 44.7                | del(11q)               | 89           |                     |                       |                      |                    |
| U009      | 21.2                | no RCA                 |              |                     |                       |                      |                    |
| B014      | 52.7                | del(11q)               | 98           |                     |                       |                      |                    |
| U011      | 44.1                | no RCA                 |              |                     |                       |                      |                    |
| I010      | 37.4                | +12                    |              |                     |                       |                      |                    |
| I011      | 25.1                | no RCA                 |              |                     |                       |                      |                    |
| I003      | 45.1                | del(13q)               |              |                     |                       |                      |                    |
| I001      | 3.7                 | no RCA                 |              |                     |                       |                      |                    |
| U013      | 2.0                 | no RCA                 |              |                     |                       |                      |                    |
| B008      | 4.1                 | del(13q)               |              | 83.2                |                       |                      |                    |
| B002      | 1.9                 | no RCA                 |              |                     |                       |                      |                    |
| H004      | 1.1                 | del(13q)               |              |                     |                       |                      |                    |

NA, not applicable; RCA, recurrent cytogenetic aberration, VAF, variant allele frequency.



Supplemental Figures

**Figure S1:** Multiple alignment of the amino acid sequences of the three EGR2 zinc-finger domains (highlighted in pink) with 7 orthologous EGR2 proteins. Mutations affecting E356, H384, and D411 are marked with a red star .

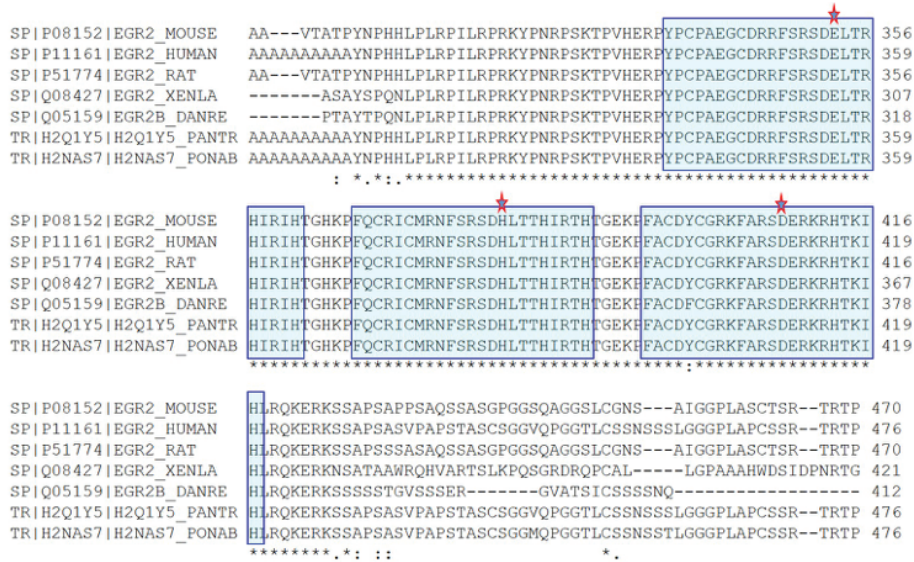

**Figure S2:** Overall survival according to ATM aberration status (i.e. mutations and/or deletions) in 45 EGR2-mutated CLL patients.

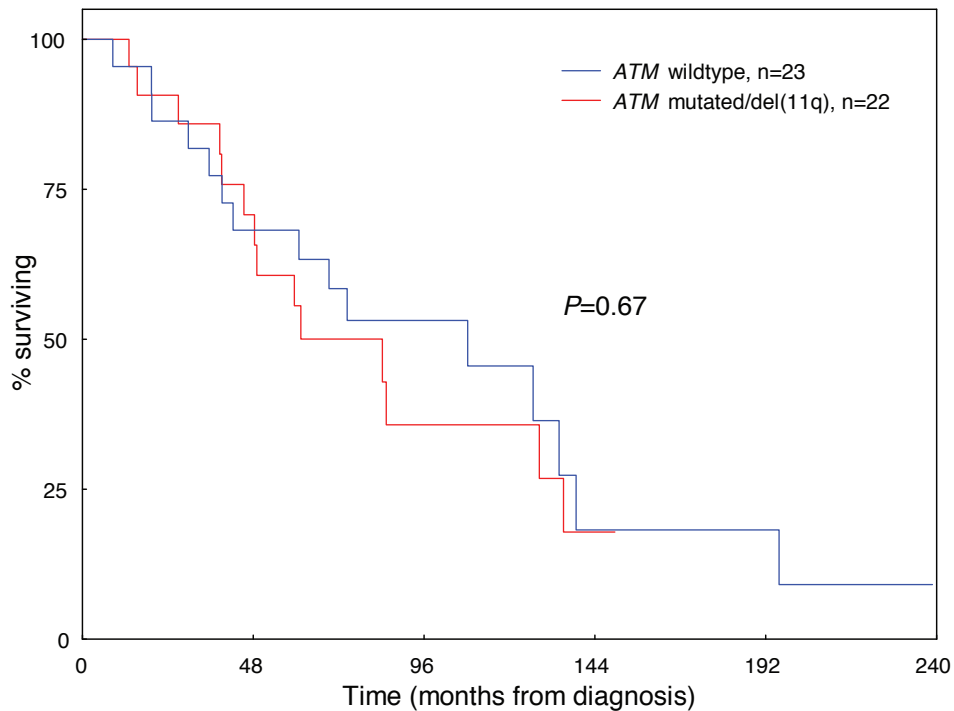

**Figure S3:** Overall survival according to *EGR2* mutation status in 691 IGHV-unmutated CLL patients.

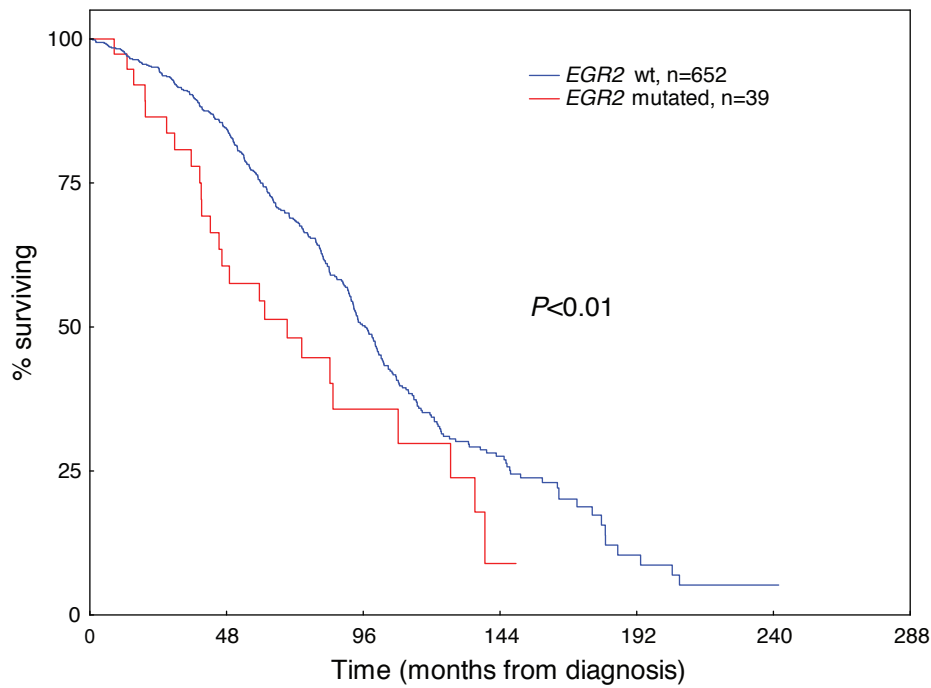

**Figure S4:** Overall survival according to *EGR2* mutation status in 164 patients with *TP53* abnormalities.

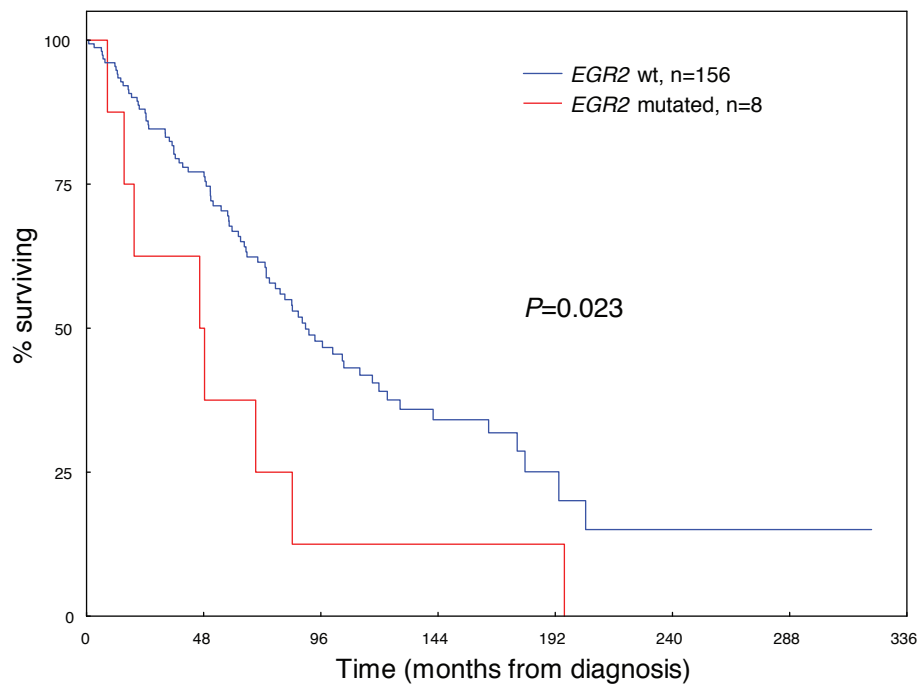

**Figure S5:** Overall survival according to subclonal *EGR2* mutation status (<5% VAF) in the screening cohort.

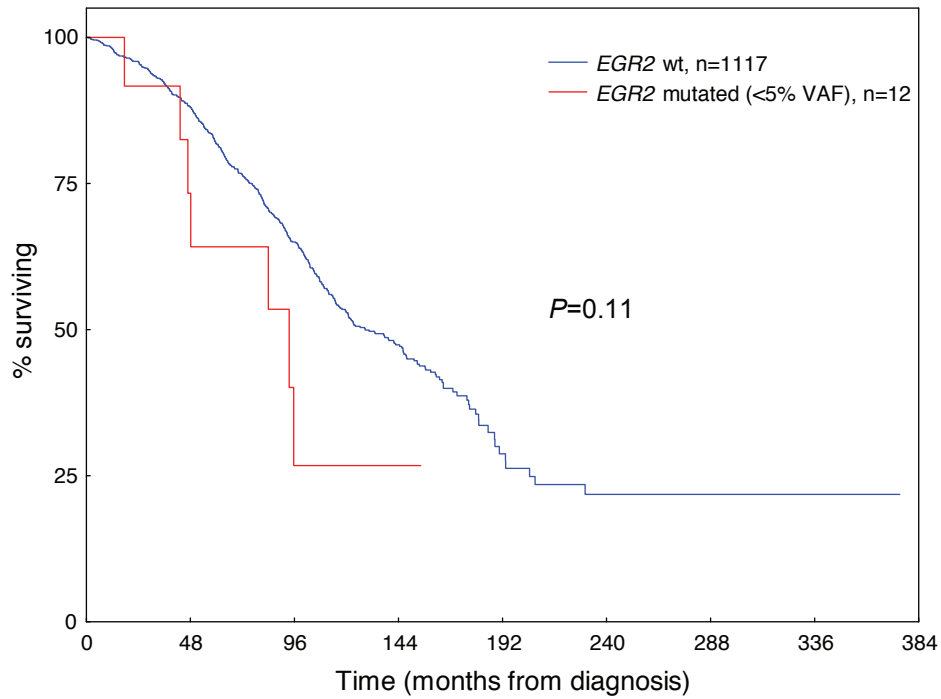

**Figure S6:** Clonal dynamics of somatic mutations identified by WES prior to FCR treatment and after relapse. Selected CLL driver mutations are highlighted in addition to *EGR2* (for full list of gene mutations see Ljungström et al, Blood 2016).

**T002**

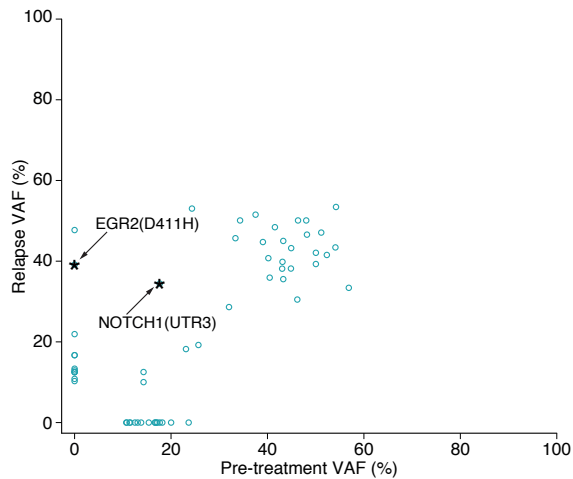

**U002**

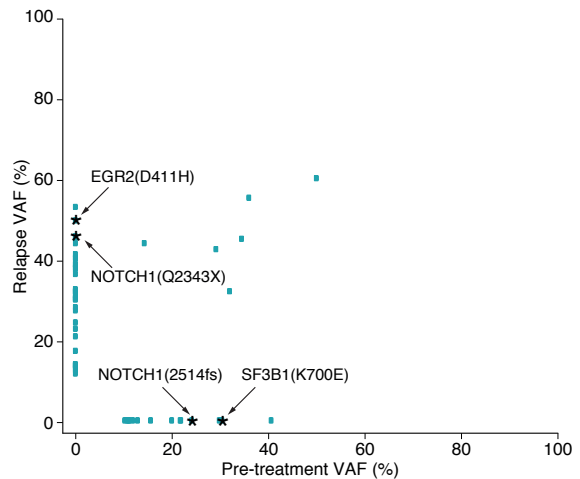

Supplement: NIHMS1068606-supplement-Supplementary_data.pdf [file NIHMS1068606-supplement-Supplementary_data.pdf]
